# Supplementary material
Source: publisher site journal article supplement (https://www.dovepress.com/article/607775)
Supplement: Supplementary file 1 [file 607775%20Supplementary%20Table.docx]

**Supplementary Table S1.** Sensitivity analyses for the association between hypofibrinogenemia and major bleeding

| **Model** | **Covariates included** | **EPV** | **Hypofibrinogenemia aOR** | **95% CI** | **p-value** |
| --- | --- | --- | --- | --- | --- |
| Original model | Hypofibrinogenemia, ALT, BUN, hemodialysis, liver disease, antithrombotic therapy | 8.7 | **2.25** | 1.14–4.44 | 0.020 |
| Parsimonious model | Hypofibrinogenemia, BUN, hemodialysis | 17.0 | **2.04** | 1.06–3.93 | 0.034 |
| Clinically informed model | Hypofibrinogenemia, BUN, hemodialysis, antithrombotic therapy*, ICU admission* | 10.4 | **2.01** | 1.03–3.92 | 0.040 |

Bold values indicate the adjusted odds ratios (aORs) for the primary exposure (hypofibrinogenemia) across all three models.

*Antithrombotic therapy and ICU admission were forced into the clinically informed model regardless of univariate p-value to address potential omitted-variable bias.

**Abbreviations:** aOR, adjusted odds ratio; CI, confidence interval; EPV, events per variable; ICU, intensive care unit.

The outcome variable was major bleeding (52 events among 231 patients). Adjusted odds ratios and 95% confidence intervals are shown for hypofibrinogenemia as the primary exposure of interest across all models. The parsimonious model (EPV 17.0) and clinically informed model (EPV 10.4) were constructed to assess the robustness of the association and to address concerns regarding limited EPV in the original model (EPV 8.7).
